# Supplementary material for: Aptamers and Aptamer-Coupled Biosensors to Detect Water-Borne Pathogens
Source: Front Microbiol. 2021 Feb 19;12:643797. doi: 10.3389/fmicb.2021.643797 (PMC7933031; doi:10.3389/fmicb.2021.643797)
Supplement: Supplementary file 1 [file Table_1.XLSX]

## Sheet: Supplementary Table S1
Table S1: Characteristics of aptamers and biosensors developped to detect water-borne pathogens.
Microbe	Aptamer	Aptamer Type	SEQUENCE	Target	KD or Affinity	Culture conditions	OD/Growth stage	Counter-Selex	Specficty tests	SENSOR	LOD	DYNAMIC RANGE	Complex Matrix	Reference
Norovirus	AG3	DNA	GCTAGCGAATTCCGTACGAAGGGCGAATTCCACATTGGGCTGCAGCCCGGGGGATCC	MuNoV	picomolar range			partitioning medium,feline calicivirus (FCV)	partitioning medium,feline calicivirus (FCV), vesicular stomatitis virus (VSV), Vaccinia virus, human serum albumin (HAS).	Electrochemical impedance sensor-AuNP modified SPCE	10aM (180 virus particles)	20 to 120aM	Meat juice	Giamberardino et al. (2013)*
									S. aureus, E. coli, E. coli MS2 phage	AuNP based Nanozyme Aptasensor	20MNV (200virus/ml)	20-1000 MNV	Media with non target microbes, human serum, shellfish homogenate	Weerathunge et al 2019
	Aptamer 25/SMV-25	DNA	CATCTGTGTGAAGACTATATGGCGCTCACATATTTCTTTC	SMV	232 nM			HuNoV-negative human stool suspension, bead-antibody complex	HuNoV VLPs of genougroup I and genogroup II, HAV,poliovirus					(Escudero-Abarca et al 2014)*,
				Non-toxic norovirus GII capsid recombinant						Chemiluminescent resonance Transfer Aptasensor	80ng/ml	0.16-10ug/ml	Tap water, Artificial urine	Kim et al 2018
	Aptamer 21/SMV-21	DNA	CCATGTTTTGTAGGTGTAATAGGTCATGTTAGGGTTTCTG	SMV	101nM			HuNoV-negative human stool suspension, bead-antibody complex	HuNoV VLPs of genougroup I and genogroup II, HAV,poliovirus					(Escudero-Abarca et al 2014)*
				Norovirus Group II (recombinant VLP)						Micro-fluidic aptasensor with graphene-gold nanocomposites	100pM	100pM-3.5nM	Media with bacterial peptidoglycan, blood	Chand et al 2017
C. parvum	R4-6	DNA	GTGGTCCCGCAAAATGCACGACGAGTCTTGCTTCTGATCT	Oocysts	177.5 ± 6.1 μA			Giardia duodenalis cysts	Giardia duodenalis cysts, HAS	Electrochemical sensor with AuNP modified SPCE	100 oocysts	150-800 oocysts	Pineapple and mango concentrate	Iqbal et al 2015*
										Electrochemical sensor -AuNP modified SPCE coupled with aptamer labelled magentic beads (MB)	50 oocysts	50-900 oocysts	River water, lake water	Iqbal et al 2019
	Min_Crypto2	DNA	TGCTTCTGATCTGCATAGGTAGTCCAGAAGCC	Oocysts					C. hominis oocysts, C. muris oocysts,Giardia duodenalis cysts	Microplate fluoresencence coupled with aptamer labelled magentic beads	5 oocysts	0-26 oocysts	River water, wastewater	Hassan et al 2020*
Acinetobacter	Aci49	DNA	TACATGGTCAACCAAATTCTTGCAAATTCTGCATTCCTACTGT	whole-cell A. baumannii (ATCC 19606)	7.547 ± 1:353 pM	BHI broth 37C° overnight	0.4/log phase	Staphylococcus aureus ATCC 25923,Haemophilus influenza type b (Hib) ATCC 10211,Neisseria meningitidis type B ATCC 13090,Streptococcus pneumonia ATCC 33400,Escherichia coli ATCC 25922,Pseudomonas aeruginosa ATCC 27853,Bacillus cereus ATCC 1015,Shigella sonnei ATCC 9290,Vibrio cholerae ATCC 39315,Moraxella catarrhalis ATCC 25240,Acinetobacter lwoffii ATCC 15309,Acinetobacter calcoaceticus ATCC 2305…	Staphylococcus aureus ATCC 25923,Haemophilus influenza type b (Hib) ATCC 10211,Neisseria meningitidis type B ATCC 13090,Streptococcus pneumonia ATCC 33400,Escherichia coli ATCC 25922,Pseudomonas aeruginosa ATCC 27853,Bacillus cereus ATCC 1015,Shigella sonnei ATCC 9290,Vibrio cholerae ATCC 39315,Moraxella catarrhalis ATCC 25240,Acinetobacter lwoffii ATCC 15309,Acinetobacter calcoaceticus ATCC 2305…	Sandwich ELASA-coupled with nanobody conjugate	103 CFU/ml.			Rasoulinejad, S et al. 2016*
						LB, 37C° , overnight	1		E. coli ATCC25922, S. aureus ATCC25923, P.aeruginosa ATCC27853	Fluorescent CRISPR-Cas12a based reporting system with biotinylated aptamer and magentic beads.	3 CFU/ml	10-105 CFU/ml	Mixed culture with non-target bacteria	Li et al 2020
						LB, 37C° , overnight	1		E. coli ATCC25922, S. aureus ATCC25923, P.aeruginosa ATCC27853	Fluorescent assay with aptamer labelled zirconium organic frameworks as capture and signal amplification tags.	10 CFU/ml	10-105 CFU/ml	Blood	Yang et al 2020
	AB aptamer	DNA	ACAGCACCACAGACCACATATCACATGCTGTCGCCTTGCGATATCAATTCCAGTGATGTTTGTCTTCCTGCC	whole-cell (A. baumannii)	6.8 ± 1.9 nM**				E. coli, MRSA	Colorimetric microfluidic sensor- Magnetic nanocomposite membranes coupled with sandwich dual aptamer assay	450 CFU/rxn	4.5 x 102 - 4.5x10 4 CFU/rxn		Wu et al 2018*, Wang et al 2019**
						trypticase soy broth (TSB) with yeast extract, 37 °C ,16 h			E. coli, MRSA	Fluorescent LED microfluidic sensor- Magnetic beads labelled with QD labelled aptamers in sandwich assay	105 CFU/ml			Su et al 2020
						trypticase soy broth (TSB) with yeast extract, 37 °C ,16 h			E. coli, MRSA	Fluorescent LED microplate sensor- Magnetic beads labelled with coupled with QD labelled aptamers in sandwich assay	100 CFU/ml	102-105 CFU/ml		Su et al 2020
						LB, 37C° , overnight (18hr)	0.4		E. coli O157:H7, Staphylococcus aureus	Ratiometric Fluoresence Resonance Energy Transfer (FRET) couplled with aptamer labelled carbon nanodots	300 CFU/ml	2.0 × 103 to 4.5 × 107 CFU/ml	Urine	Bahari et al 2020
Aeromonas	Apt1	DNA	GGTGGAGGTGGGGGTTGGGTGGGGTTGCGTTCAGT	whole-cell (A. hydrophila)		LB ,37C° , 18hrs			E. coli, Erwinia, A. caviae, A. veronii, B. subtilis	Fluorescent sensor based on graphene oxide and FAM labelled aptamers	1.5 CFU/ml	0.1 - 1.3x 105 CFU/ml	Fish Body	Zhu et al 2019
Campylobacter	Aptamer C2 and Aptamer C3			surface protein (C. jejeuni)					heat-killed C. jejeuni,C. coli, C. lari, E. coli ATCC 8739, E. coli O157:H7 ,E. faecalis, Salmonella Typhimurium, Listeria monocytogenes	Fluorescent sensor based on Quantam dot labelled aptamer and aptamer labelled magnetic beads-Sandwich Assay format	2.5 CFU/ml	2.5-2.5x106 CFU/ml	Chicken juice, milk,ground beef wash	Bruno et al 2009*
						blood agar, 42C° , 10 days, microaerophillic conditions			C. coli, C. lari, C. jejeuni, E. coli 8739, S. choleraesuis, S. enterica	colorimetric microplate sensor-ELASA using invidual aptamers	5-10 CFU/ml	.	Chicken rinsate	Bruno et al 2017
	ONS-23	DNA	GCAAGATCTCCGAGATATCGTGCTGGGGGGTGGTTTGTTTGGGTCGGTTGTTTTGGTTGGGCTGCAGGTAATACGTATACT	whole-cell (C. jejuni A9a)	292.8 +/- 53.1 nM	BBL brucella broth, 42C° 48 hours, microaerophillic conditions		Pseudomonas fluorescens (ATCC13525), Pseudomonas aeruginosa (ATCC23993), Shigella flexneri (ATCC12022), E. coli O157:H7, Bacillus cereus (ATCC49063), Staphylococcus aureus (ATCC23235), B. cereus (strain T), Listeria monocytogenes (ATCC19115), L. monocytogenes Scott A, Salmonella enterica subsp. Enterica (ATCC4931), E. coli (ATCC33625), Shigella sonnei (ATCC25931), Streptococcus gallolyticus (ATCC…	C. jejuni ATCC33560 (bovine feces), C. jejuni 2083 (cattle), C. jejuni ATCC33291 (human feces), C. jejuni A14a (poultry processing plant),C. coli ATCC 43478, B. cereus strain T, E. coli O157:H7, L. monocytogenes (ATCC19115)					Dwivedi et al 2010*
						CCDA media, 37 °C, 48hr, microaerophillic conditions			Campylobacter coli, Helicobacter pylori, E. coli	colorimetric aptasensor coupled with peroxidase like Au@Pd nanoparticles	10 CFU/ml	10-107 CFU/ml	milk	Dehghani et al 2018
						Bolton Broth, 42C° , 48hrs, microaerophillic conditions			heat-killed C. jejuni, heat killed C. coli ; C. jejuni: ATCC 33560, NCTC11168, 2 human isolates, 3 food isolates; C. coli: ATCC 33559, 3 food isolates, Salmonella Enteritidis, Bacillus cereus ATCC 14579, Staphylococcus aureus ATCC 6538, Enterococcus faecalis, Enterobacter cloacae, (ESBL)-producing Escherichia coli	Colorimetric sensor using AuNP	7.2 x105 CFU/ml**	105 x108 CFU/ml**	chicken carcass**	Kim et al 2018
	Aptamer 229												food and environmental samples	Jaykus et al 2011*
	CJA1	DNA	CTGCGATCAAGTTACGCACCTCGCCATGTTCCCCGCCCGGCATGTGTTATGCCCCTGTG	whole-cell (C. jejuni)	1.37 ± 0.28 nM				E. coli, V. parahemolyticus, Salmonella spp., S. aureus, Shigella spp.	Colorimetric microplate sensor-hetero sandwich assay using monoclonal antibody and biotinylated aptamer	10 CFU/ml	1.7 × 101 to 1.7 × 106	milk	Chen et al 2020*
Cyanobacteria	ATX8	DNA	TGGCGACAAGAAGACGTACAAACACGCACCAGGCCGGAGTGGAGTATTCTGAGGTCGG	anatoxin-a (ATX)	81.3 nM			Target(ATX) free beads	binding buffer, MC-LR, CYN	Electrochemical impedimetric sensor	0.5nM	1nM-100nM	spiked water samples, certified water samples	Elshafey et al 2015*
	MC-LR aptamer/AN6	DNA	GGCGCCAAACAGGACCACCATGACAATTACCCATACCACCTCATTATGCCCCATCTCCGC	Microcystin-LR	50nM			blank sepharose beads,	MC-YR,MC-LA	Electrochemical potentiometric sensor	10pM	10pM to 10nM		Ng et al 2012*
									MC-YR,MC-LA,MC-RR,OA	Fluoresence aptasensor using Upconversion nanoparticles (UCNPs) grafted molybdenum disulfide nanosheets. (FAUM)	0.002 ng/ml	0.01–50 ng/ml	tap water, lake water	Lv et al 2017
E.coli	L9F	DNA	ATCCGTCACACCTGCTCTACTGGCCGGCTCAGCATGACTAAGAAGGAAGTTATGTGGTGTTGGCTCCCGTAT	O111-LPS		35C° , TSB,overnight								Bruno et al 2008*
						LB,37C° , 16 hrs			Salmonella Typhimurium, Staphylococcus aureus, non‐pathogenic E. coli	Electrochemical voltammetric sensor -Au electrode,capture probe, aptamer and the biotinylated detection probe coupled with streptavidin‐alkaline phosphatase (ST‐AP), and substrate α‐naphthyl phosphate (α‐NP)	112 CFU/ml	102 - 106 CFU/ml	milk	Luo et al 2012*
	Eco4R/ECAII	DNA	ATCCGTCACACCTGCTCTACGGCGCTCCCAACAGGCCTCTCCTTACGGCATATTATGGTGTTGGCTCCCGTAT	Outer membrane protien (OMP) of ( E. coli strain 8739)		37C° , blood agar, overnight			C. coli, C. jejuni, E. faecalis, S. enterditis , E.coli O157:H7, E.coli HB101					Bruno et al 2010*
						E. coli strain 8739, 37C, blood agar, overnight			MC-LR	Electrochemical impedance sensor with Au electrode thiolated aptamer	.	1 × 10−7 and 2 × 10−6 M	spiked well water with OMP proteins	Queirós et al 2013
	Eco4F	DNA	ATACGGGAGCCAACACCATAATATGCCGTAAGGAGAGGCCTGTTGGGAGCGCCGTAGAGCAGGTGTGACGGAT	OMP		37C° , blood agar, overnight			C. coli, C. jejuni, E. faecalis, S. enterditis , E.coli O157:H7, E.coli HB101					Bruno et al 2010*
						37C° ,blood agar,overnight		.	E. coli O157:H7,Bacillus cereus, Enterococcus faecalis, Listeria monocytogenes, Salmonella enterica serovar Typhimurium, Staphylococcus aureus	Lateral flow assay with streptavidin labelled Quantam Dots,5’-biotin and 3’-digoxigenin (dual-labeled) conjugate aptamer (Eco3R) ,and amino labelled capture aptamer (Eco4F)	300 CFU/ml			Bruno et al 2014
	Eco3R/ECAI	DNA	ATCCGTCACACCTGCTCTGTCTGCGAGCGGGGCGCGGGCCCGGCGGGGGATGCGTGGTGTTGGCTCCCGTAT	OMP		37C° , blood agar, overnight			C. coli, C. jejuni, E. faecalis, S. enterditis , E.coli O157:H7, E.coli HB101					Bruno et al 2010*
						37C° , blood agar, overnight			MC-LR	Electrochemical impedance sensor with Au electrode thiolated aptamer	.	1 × 10−7 and 2 × 10−6 M	spiked well water with OMP proteins	Queirós et al 2013
						37C°,blood agar,overnight			E. coli O157:H7,Bacillus cereus, Enterococcus faecalis, Listeria monocytogenes, Salmonella enterica serovar Typhimurium, Staphylococcus aureus	Lateral flow assay with streptavidin labelled Quantam Dots,5’-biotin and 3’-digoxigenin (dual-labeled) conjugate aptamer (Eco3R) ,and amino labelled capture aptamer (Eco4F)	300 CFU/ml			Bruno et al 2014
										Evanescent wave fiber optic sensor with long period gratings (LPG)	0.1nM	0.1 nM to 10 nM	spiked well water with OMP proteins	Queiros et al 2014
	E1	DNA	GCAATGGTACGGTACTTCCACTTAGGTCGAGGTTAGTTTGTCTTGCTGGCGCATCCACTGAGCGCAAAAGTGCACGCTACTTTGCTAA	whole cell (E. coli fecal isolate)	12.4nM	NB, 37C°	0.45/log	E. coli, Staphylococcus epidermis, Citrobacter freundii, Bacillus subtilus, Klebsiella pneumonia, Enterobacter aerogenes	E. coli (KCTC 1681,2671,2618) Staphylococcus epidermis, Citrobacter freundii, Bacillus subtilus, Klebsiella pneumonia, Enterobacter aerogenes					Kim et al 2013*
	E2	DNA	GCAATGGTACGGTACTTCCCCATGAGTGTTGTGAAATGTTGGGACACTAGGTGGCATAGAGCCGCAAAAGTGCACGCTACTTTGCTAA	whole cell (E. coli fecal isolate)	25.2nM	NB, 37C°	0.45/log	E. coli, Staphylococcus epidermis, Citrobacter freundii, Bacillus subtilus, Klebsiella pneumonia, Enterobacter aerogenes	E. coli (KCTC 1681,2671,2618) Staphylococcus epidermis, Citrobacter freundii, Bacillus subtilus, Klebsiella pneumonia, Enterobacter aerogenes					Kim et al 2013*
						LB agar, 37C° , 16 hrs followed by LB broth, 37C° , 16hrs			E. coli (ATCC 25922), E. coli DH5α, Staphylococcus aureus (ATCC 25923), Bacillus subtilus (ATCC 6633)	FRET aptasensor using upconversion nanoparticles (UCNPs) conjugated with complementary DNA as donors, and AuNPs conjugated with aptamer as acceptors	3 CFU/ml	5-106 CFU/ml	tap water, pond water, milk	Jin et al 2017
						NB,37C° , 24 hrs			E. coli K12, S.mutans, S.saprophyticus	Electrochemical graphene field effect transistor modified with pyrene tagged aptamer	100 CFU/ml	102 -105 CFU/ml		Wu et al 2017
	E10	DNA	GCAATGGTACGGTACTTCCGTTGCACTGTGCGGCCGAGCTGCCCCCTGGTTTGTGAATACCCTGGGCAAAAGTGCACGCTACTTTGCTAA	whole cell (E. coli fecal isolate)	14.2 nM	NB, 37C°	0.45/log	E. coli, Staphylococcus epidermis, Citrobacter freundii, Bacillus subtilus, Klebsiella pneumonia, Enterobacter aerogenes	E. coli (KCTC 1681,2671,2618) Staphylococcus epidermis, Citrobacter freundii, Bacillus subtilus, Klebsiella pneumonia, Enterobacter aerogenes					Kim et al 2013*
	E1+E2+E10	DNA				NB, 37C°			Klebsiella pneumoniae (KCTC 2208), Citrobacter freundii (KCTC 2006), Enterobacter aerogenes (KCTC 2190), Staphylococcus epidermidis (KCTC 1917)	Electrochemical potentiometric sensor-Au electrode	371 CFU/ml			Kim et al 2014
	AptB12	DNA	TGGGAGCTCAGAATAAACGCTCAAGGCACACAGGACTATACAGTGTTGCAGTGTTGCTGTTCGACATGAGGCCCGGATCA	whole cell (ETEC K88)	15nM	LB	log phase	ETEC K99, S. enteritidis, S. aureus	S. aureus, Salmonella enteriditis , ETEC K99	Fluoresence aptasensor-antibody labelled magentic beads for target capture followed by FITC-aptamer labelling	1.1 × 103 CFU/ml	103-105 CFU/ml	fecal matter concentrate	Peng et al 2014*
	RNAaptamer	RNA	GGGAGAGCGGAAGCGUGCUGGGUCGCAGUUUGCGCGCGUUCCAAGUUCUCUCAUCACGGAAUACAUAACCCAGAGGUCGAU			LB,37C° , 2-3 hrs			S. Typhimurium	Aptamer-Functionalized Single-Walled Carbon-Nanotube (SWCT) Field-Effect Transistors (FET)	.			So et al 2008*
						LB,37C° , 15 hrs			S. Typhimurium, L. monocytogenes	immunomagnetic target separation coupled with RT-PCR amplification of aptamers from aptamer labelled target	10 CFU/ml	10-107 CFU/ml		Lee et al 2009
						LB,37C° , 24 hrs			Salmonella enterica, Lactobacillus casei, Escherichia coli (CECT 4558)	electrochemical potentiometric sensor-SWCNT modified electrodes coated with aptamer	6-26 CFU/ml	4- 104 CFU/ml	milk,juice	Zelada-Guillen et al 2010
	Aptamer I-1	DNA	GGGTCTTCCTGGACTGTCGAAAATTCAGTATCGGGACCTTACGTATTTCCTTTATAGATAGTAA	O-antigen LPS (E. coli O157:H7)	110nM	Brucella broth,37 °C ,24 h (+0.04% formaldehyde)		E. coli K12						Lee et al 2012*
						TSB,35C° ,24 hrs				Electrochemical impedimetric sensor using platinum nanocauliflower-graphene hybrids on nanocellulose paper.Immobilized with thiolated RNA aptamer	4CFU/ml	4 -105 CFU/mL	Vegtable broth	Burrs et al 2016
	Ec3(31)	RNA	UUCAAUUGCACGAAUUUGCUGUGUUUUUGGG	whole cell (E. coli DH5 alpha)		LB	0.4	B. subtilis	E. coli K12, E. coli KCTC2571, Enterobacter mori, Enterobacter arerogens, Serratia marcescens, B. subtilis	Electrochemical impedance sensor	2 × 104 CFU/mL	104-108 CFU/ml		Dua et al 2016*
	P12-31	DNA	TCATCGGGATACCTGGTAAGGATA	whole cell (E. coli O6)	87nM	37C° ,LB	0.3		Klebsiella pneumonia ATCC 27853, Enterobacter aerogenes ATCC 13048, Proteus mirabilis ATCC 00557, Pseudomonas aeruginosa ATCC 700603, Staphylococcus aureus ATCC 29213 ,Enterococcus faecalis ATCC 29212, Enterobacter cloacae, Proteus vulgaris, Morganella morganii, Citrobacter freundii, Acinetobacter baumannii, Enterococcus faecalis, Enterococcus faecium, MNEC clinical isolates					Marton et al 2016*
	AM-6	DNA	GAGTTGGGGTGATGGGTGCATGTGATGAAAGGGGTTCGTGCTATGCTGTTTTGTCTAATAATACTAGTCCTTGCCAAGGTTTATTC	whole cell (E. coli O157:H7)	107.6 ± 67.8 pmol	LB	0.6	E. coli strains O42, K12, Top10, DH5α, Shigella flexneri, Salmonella typhi	E. coli strains O42, K12, Top10, DH5α, Shigella flexneri, Salmonella typhi					Amraee et al 2017*
	S1	DNA	TGGTCGTGGTGAGGTGCGTGTATGGGTGGTGGATGAGTGTGTGGC	whole cell (E. coli O157:H7)	10.3nM	BHI, 37C°	log phase	S. aureus, S. Typhyimurium, L. monocytogenes	E. coli K12,S. aureus, S. Typhyimurium, L. monocytogenes	QCM aptasensor	1.46 × 103 CFU/ml	102-107 CFU/ml		Yu et al 2018*
	Apt-5	DNA	TGAGCCCAAGCCCTGGTATGCGGATAACGAGGTATTCACGACTGGTCGTCAGGTATGGTTGGCAGGTCTACTTTGGGATC	whole cell (E. coli O157:H7)	9.04 ± 2.80 nM	LB,37C°	0.1 (lag),0.5(log),1.3(stationary)	Salmonella Typhimurium , Staphylococcus aureus , Escherichia coli , Shigella flexneri , Escherichia coli ETEC	Salmonella Typhimurium , Staphylococcus aureus , Escherichia coli , Shigella flexneri , Escherichia coli ETEC					Zou et al 2018*
	a-aptamer/E-17F72*/E-17F37**	DNA	ATCAAATGTGCAGATATCAAGACGATTTGTACAAGATCCATGCTGAGGTGGTCATAGCTGATCCTACC	O157:H7 LPS		LB,37C°			**E. coli (ATCC25922, CMCC44825, CMCC44155, CMCC44151), Salmonella Typhimurium (CMCC50115), Salmonella Typhi (CMCC50071), Salmonella paratyphi A(CMCC50433), Salmonella paratyphi B (CMCC50004), Shigella sonnei (ATCC25931), Shigella flexneri (CMCC51571), Proteus vulgaris (CMCC49072), Enterobacter aerogenes (ATCC 13048), Citrobacter freundii (ATCC8090), Staphylococcus aureus (ATCC25923) ,Monilia alb…					Bruno et al 2009*,Wu et al 2012**
	c-aptamer/E-18R72*/E-18R42**	DNA	TTTCCGGACGCTTATGCCTTGCCATCTACAGAGCAGGTGTGACG	O157:H7 LPS		LB,37C°			**E. coli (ATCC25922, CMCC44825, CMCC44155, CMCC44151), Salmonella Typhimurium (CMCC50115), Salmonella Typhi (CMCC50071), Salmonella paratyphi A(CMCC50433), Salmonella paratyphi B (CMCC50004), Shigella sonnei (ATCC25931), Shigella flexneri (CMCC51571), Proteus vulgaris (CMCC49072), Enterobacter aerogenes (ATCC 13048), Citrobacter freundii (ATCC8090), Staphylococcus aureus (ATCC25923) ,Monilia alb…					Bruno et al 2009*, Wu et al 2012**
	a-aptamer, c-aptamer					LB,37C° ,16 hrs	>1		dead E. coli O157:H7, Salmonella Typhimurium, Salmonella enterica, Pseudomonas aeruginosa, E.coli DH5α	Lateral flow assay coupled with complementary sequence labelled AuNPs and aptamer mediated isothermal strand displacement amplfication	10CFU/ml	10 - 106 CFU/ml	milk,water,apple juice	Wu et al 2015
	a-aptamer, c-aptamer					LB,35C° ,24 hrs			Salmonella Typhimurium, Staphylococcus aureus, Listeria monocytogenes, Staphylococcus aureus, Salmonella Typhimurium, E. coli JM109, E. coli BOZO 2.7, E. coli NS428, E. coli BHB2688 strains, E. coli O103: NM, E. coli O121:H19, E. coli O55:H7	Colorimetric aptasensor-Ink jet printed aptamer with antibody coated Au+polystyrene particles for colorimetric detection	25 CFU/ml	10 -103 CFU/ml	ground beef homogenate	Diaz-Amaya et al 2019
	a-aptamer, c-aptamer					LB,35C° ,24 hrs			Listeria monocytogenes, Staphylococcus aureus, E. coli B1201, E. coli O55:H7, Salmonella Typhimurium	Surface Enhanced Raman Spectroscopy (SERS) analysis with aptamers covalently conjugated to 4-aminothiophenol-AuNPs	100 CFU/ml	102 - 106 CFU/ml	ground beef homogenate	Diaz-Amaya et al 2019
	c-aptamer								Heat killed E. coli O157:H7, Listeria innocua, E. coli K12, E. coli ER2420	Fluoresence microfluidic aptasensor with aptamer conjugated dendrimers	100 CFU/ml for G7 dendrimer channels	102 - 107 CFU/ml		Hao et al 2019
									formalin killed E. coli O157:H7, Listeria innocua, E. coli K12, E. coli ER2420	Fluoresence microfluidic aptasensor in a sandwich assay format with rolling circle amplified (RCA) aptamers conjugated to dendrimers and RCA aptamer reporters	80 CFU/ml	102 - 105 CFU/ml	milk, orange juice	Jiang et al 2020
Helicobacter pylori	Hp-Ag aptamer	DNA	GGCCCACGATGCATCCTATCGCACCGCCCCGTGCCACCTG	recombinant Hp surface antigen	32.56 ± 7.16 nM			BSA						Gu et al 2018*
	Hp4	DNA	CGGCGCGGTTGTGGGTACCTAGGGTTGTTGTTGCTTCTCA	recombinant Hp surface antigen	26.48 ± 5.72nM	blood agar, 37C° , 3 days		BSA	E. coli, Staphylococcus aureus, Vibrio anguillarum					Yan et al 2019*
Legionella	R10C5	DNA	ACAGAATCAGTTCGAGTACATACGCGCGAAGACTCCTAAGGCCGTAGCGTTCTTCCCGGTAATACCATG	whole cell (Lp120292)	116nM	CYE agar plate, 37C° ,3 days followed by AYE media,37C° ,24hr, followed by water (Fraquil) suspension 24 hrs	2.5/post-exponential phase	Pseudomonas putida KT2440, Pseudomonas fluorescens LMG1794	Pseudomonas sp., Brevundiomonas sp., Bacillus sp., Staphylococcus sp. Sphingomonas sp., Stenotrophomonas sp. ,Cupriavidus sp				artificial freshwater medium (Fraquil)	Saad et al 2020*
	R10C1	DNA	TGTACTCCCGCGTCCCACCTGCTACCCGAAATAGAGTTTCCCTAGAAAGGCTTGCCCAAC	whole cell (Lp120292)	135nM	CYE agar plate, 37C° ,3 days followed by AYE media,37C° ,24hr, followed by water (Fraquil) suspension 24 hrs	2.5/post-exponential phase	Pseudomonas putida KT2440, Pseudomonas fluorescens LMG1794	Pseudomonas sp., Brevundiomonas sp., Bacillus sp., Staphylococcus sp. Sphingomonas sp., Stenotrophomonas sp. , Cupriavidus sp				artificial freshwater medium (Fraquil)	Saad et al 2020*
NTM	BM2/N31	DNA	GCGGAATTCTAATACGACTCACTATAGGGAACAGTCCGA GCC CCCCATGAACTAGGCTCCACAATGAGTTTGGGGGTCAATGCGTCATAGGATCCCGC	mycobacterial-specific glycolipid, mannosylated lipoarabinomannan (ManLAM), M. bovis (BCG)	8.59 ± 1.23 nmol/L	L-J medium	log phase		BCGΔ2196, Mycobacterium smegmatis, M. tb H37Rv, Mycobacterium marinum, Mycobacterium intracellulare, Mycobacterium avium, Staphylococcus aureus, Salmonella Typhimurium C5, Escherichia coli DH5α, Salmonella typhi Ty21a	ELONA	104 CFU/ml			Sun et al 2016*
										Electrochemical sensor with Au electrodes, methylene blue as redox probe and truncated apater				Poch et al 2020
Pseudomonas aeruginosa	F23	DNA	CCCCCGTTGCTTTCGCTTTTCCTTTCGCTTTTGTTCGTTTCGTCCCTGCTTCCTTTCTTG	whole cell (ATCC 27853)	17.27 ± 5.00 nM	Mueller-Hinton (MH) media, 37C° , 24 hrs		S. maltophilia , A. baumannii	Pseudomonas aeruginosa ATCC 49189, ATCC 10145, ATCC 15442, Pseudomonas fluorescens ATCC 49838, Pseudomonas putida ATCC 49128, Pseudomonas stutzeri ATCC 17588 , Escherichia coli DH5α ,Klebsiella pneumoniae ATCC 13883, Staphylococcus aureus ATCC 29213, S. maltophilia , A. baumannii	Fluoresence In Situ Hybridization (FISH)				Wang et al 2011*
						LB broth, 37C° , 12 hrs			E. coli O157:H7, S. aureus, S. enterica	Fluorescent aptasensor with graphene oxide quantam dots (GO-QDs), aptamer and FAM labelled complementary sequence	100 CFU/ml	1.28 × 103–2.00 × 107 CFU/mL	drinking water, orange juice, popsicle	Gao et al 2018
						LB plate, 37C° , 24 hrs followed by LB broth,37C° , 9 hrs	0.8/exponential phase		PA14, Escherichia coli DH5α, Staphylococcus aureus RN4220	Long range SPR coupled with Au nanotriangle array sensor surface, PEG-thiol, thiol-PEG-biotin,neutravidin and biotinylated aptamer	1 CFU/ml	10–103 CFU/ml		Hu et al 2018
						LB broth, 37C° , overnight			E. coli O157:H7, L. monocytogenes, S. aureus, S. enterica	Fluorometric aptasensor with magentic nanoparticles modified with aptamer and FAM complementary sequence	1 CFU/ml	10-108 CFU/ml	water, orange juice, melted popsicle	Zhong et al 2018
						BHI broth, 37C° , overnight	1		Vibrio cholerae clinical isolate, Listeria monocytogenes , Staphylococcus aureus clinical isolate	Dual Electrochemical and colorimetric sensor using peroxidase like AuNPs modified with aptamers and TMB substrate	60 CFU/ml	60 to 6.0 × 107 CFU/mL	water	Das et al 2019
						LB broth			Escherichia coli, Salmonella enteritidis, Shigella flexneri, Klebsiella pneumoniae	Impedimetric aptasensor with glassy carbon electrodes modified with silver nanoparticles labelled with aptamer	33 CFU/ml	102 - 107 CFU/ml	blood	Roushani et al 2019
						NB, 37C° , 24 hours			E. coli ATCC 25922, S. aureus ATCC 25923, K. pneumoniae ATCC33495, S. pyogenes ATCC 19615, E. cloacae clinical isolate, E. faecalis clinical isolate	Au niterdigital electrode connected to a multichannel series piezoelectric quartz crystal (Au IDE-MSPQC) system with biotinylated aptamer and poly-adenylated complementary sequence	9 CFU/ml	8.1 × 10 to 8.1 × 105 CFU/mL	simulated blood sample	Shi et al 2019
	St17Lp21	DNA	ATCCTCCTAGGTAACTGTTCAGGATGTAGGAGGGT	biofilm-derived whole cells (PA 692 /ATCC 14502)	16.9nM	LB broth,37C° ,16 hrs followed by 22C° , 42 hours to make biofilm.	exponential		Salmonella enterica serovar Typhi, Klebsiella pneumoniae, Enterobacter cloacae, Escherichia coli DH5α,Listeria innocua, PAO1					Soundy et al 2017*
	St21Lp17	DNA	AAGCGTCGGTGTTCTATCGGTAGTTGACACCGACGCCT	biofilm-derived whole cells (PA 692 /ATCC 14502)	13.5nM	LB broth,37C° ,16 hrs followed by 22C° , 42 hours to make biofilm.	exponential		Salmonella enterica serovar Typhi, Klebsiella pneumoniae, Enterobacter cloacae, Escherichia coli DH5α,Listeria innocua, PAO1					Soundy et al 2017*
	St08Lp17	DNA	ATGCACTCTTCTATCGGTAGTTGAGGGTGCGG	biofilm-derived whole cells (PA 692 /ATCC 14502)	12.5nM	LB broth,37C° ,16 hrs followed by 22C° , 42 hours to make biofilm.	exponential		Salmonella enterica serovar Typhi, Klebsiella pneumoniae, Enterobacter cloacae, Escherichia coli DH5α,Listeria innocua, PAO1					Soundy et al 2017*
	F23+St08Lp17					LB broth, 37C° , overnight			E. coli O157:H7, L. monocytogenes, S. aureus, S. enterica	Fluoremetric sensor with dual-aptamer labeled polydopamine-polyethyleneimine (PDA-PEI) copolymer dots	1 CFU/ml	10–107 CFU/ml	milk,orange juice, popsicle	Zhong et al 2020
Salmonella	aptamer 33	DNA	TATGGCGGCGTCACCCGACGGGGACTTGACATTATGACAG	OMP (S. Tyhpimurium PT10)		BHI, 37C° , 2-3 hrs		E. coli OMP and LPS, Salmonella LPS	S. Typhimurium (Dublin, Enteritidis, Fresno, Hadar, Javiana, Moscow, Newport ), Escherichia coli	Magentic bead based pull down assay and qPCR	10-100 CFU/ml		chicken rinsate	Joshi et al 2009*
						BBL-BHI media, 37C° , overnight	0.3		Listeria monocytogenes, E. coli, Vibrio parahemolyticus, E. sakazakii, Streptococcus	Fluoresence aptasensor with dual aptamer UCNP and MNPs	5 CFU/ml	10-105 CFU/ml	lake,puddle,stream	Duan et al 2012
						LB broth, 37C° , 12 hr	0.12		Listeria monocytogenes, Bacillus subtilis, Staphylococcus aureus, Streptococcus pyogenes, Escherichia coli, Enterobacter sakazakii	Electrochemical sensor using electrochemical impedance spectroscopy (EIS) with glassy carbone electrodes (GCE), modified with graphene-oxide (GO) and AuNPs and aptamer	3 CFU/ml	2.4–2.4 × 103 CFU/mL	pork homogenate	Ma,Xiaoyuan. et al 2014
						LB broth, 37C° , 24hrs			S. Typhi, S. Paratyphi A ,S. Paratyphi B, Staphylococcus aureus, V. parahaemolyticus, E. coli	Electrochemical sensor using ITO multiple wall carbon nanotubes modified with aptamers.	55 CFU/ml	55 - 5.5✕ 106 CFU/ml	chicken homogenate	Hasan et al 2018
									E. coli, P. aeruginosa, Lactobacillus acidophilus	LSPR with aptamer immobilized on dielectric layer-SiNPs coated with thin Au layer	30 CFU/ml	104 - 109 CFU/ml		Yoo et al 2015
						LB broth,37C° , 18-20hrs			L. acidophilus, P. aeruginosa, E. coli.,S. tennessee, S. muenchen.	LSPR with AuNP modified sensor surface and aptamers	104 CFU/ml	104 - 106 CFU/ml	pork rinsate	Oh et al 2017
	ST2P	DNA	ATAGGAGTCACGACGACCAGAAAGTAATGCCCGGTAGTTATTCAAAGATGAGTAGGAAAAGATATGTGCGTCTACCTCTTGACTAAT	whole cell (Salmonella Typhimurium ATCC 50761)	6.33 ± 0.58 nM	BBL-BHI, 37C° , overnight	0.3/log phase	L. monocytogenes, E. coli, S. aureus, S. pneumoniae, V. parahemolyticus, C. sakazakii	L. monocytogenes, E. coli, S. aureus, S. pneumoniae, V. parahemolyticus, C. sakazakii	Fluoresence aptasensor with aptamer modified MNPs and FAM-labelled aptamers	25 CFU/ml	50–106 CFU/mL		Duan et al 2013*
						LB media, 37C° , 24 hrs	stationary phase		L. monocytogenes, E. coli, S. aureus, V. parahemolyticus	Colorimetric SERS aptasensor using aptamer labelled magnetic NPs and AuNPs	10 CFU/ml	25-105 CFU/ml	milk	Duan et al 2016
						LB media, 37C° , overnight	stationary phase		L. monocytogenes, E. coli, S. aureus, V. parahemolyticus	Fluorescent aptasensor with dsDNA intercalating dye AccuBlue, aptamer and complementary DNA	25 CFU/ml	50–106 CFU/mL	chicken homogenate, shrimp homogenate	Duan et al 2014
	S8-7	DNA	CTGATGTGTGGGTAGGTGTCGTTGATTTCTTCTGGTGGGG	whole cell (Salmonella Typhimurium S913)	1.73 ± 0.54 μM	TSB-amp, 37C° , overnight		L. monocytogenes Scott A, E. coli O157: H7 ATCC43895, B. cereus ATCC49063, E. faecalis ATCC29212	B. cereus (ATCC49063), E. coli O157:H7 (ATCC43895), Citrobacter braakii (ATCC29219)					Dwivedi et al 2013*
	C4	DNA	ACGGGCGTGGGGGCAATGCCTGCTTGTAGGCTTCCCCTGTGCGCG	whole cell (Salmonella Typhimurium)		BHI, 35C° , overnight		Escherichia coli, Salmonella Enteritidis, Staphylococcus aureus	Escherichia coli, Staphylococcus aureus					Moon et al 2013*
	Apt22	DNA	ATGGACGAATATCGTCTCCCAGTGAATTCAGTCGGACAGCG	whole celll (S. paratyphi A)	47nM	NB,37C°	2.1/early log	S. Enteritidis, S. Typhimurium, S. Cholerae-suis, S. Arizonae	E. coli K88, Staphylococcus aureus, S. Enteritidis, S. Cholerae-suis, S. Arizonae	single-walled carbon nanotubes (SWCNTs) and DNAzyme-labeled aptamer detection probes	1000 CFU/ml	103 - 107 cfu/mL	City water	Yang et al 2013*
	S25	RNA	GGGUUCACUGCAGACUUGACGAAGCUUGAGAGAUGCCCCCUGAUGTGCAUUCUUGUUGUGUUGCGGCAAUGGAUCCACAUCTACGAAUUC	whole cell (S. enteriditis-multiple)	.	TSB, overnight		Salmonella serovars-multiple	S. Typhimurium, S. Newport, S. Infantis, S. Agona, S. Heideliberg					Hyeon et al 2012*
	SAL26	DNA	TAGCTCACTCATTAGGCACATTTGTGGCACCAAATTTGAATTAATCAAGACAGTGTGGTGCATAGTTAAGCCAGCC	whole cell (Salmonella Typhimurium ATCC14028)	123 ± 23 nM	TSB,37C° , overnight culture followed by TSB,37C° , 3 hours then fixing with methanol	log phase	Salmonella enterica serovar Newport, Salmonella enterica serovar Brunei, Salmonella enterica serovar Paratyphi A, Salmonella enterica serovar Infantis, Escherichia coli, Staphylococcus aureus, Klebsiella spp, Enterobacter spp, Proteus spp, Shigella flexneri, Pseudomonas aeruginosa, Listeria monocytogenes, Bacillus cereus	Salmonella enterica :Newport (ATCC6962), Brunei (MTCC1168), Paratyphi A (ATCC9150), Infantis (MTCC1167), Escherichia coli (ATCC11234), Staphylococcus aureus (NCIM2120), Klebsiella spp , Enterobacter spp , Proteus spp , Listeria monocytogenes (ATCC19115), Pseudomonas aeruginosa (ATCC23993), Shigella flexneri (ATCC91990), Bacillus cereus (ATCC49063)	Colorimetric aptasensor using AuNP labelled with aptamers	100 CFU/ml			Lavu et al 2016*
	SAL1	DNA	ATTAGTCAAGAGGTAGACGCACATAAGGGGTCTGGTGTCGGGCCGCGGGTCAGGGGGGTAAGGGATTCTGGTCGTCGTGACTCCTAT	whole cell (Salmonella paratyphi A ATCC 9150 )		LB broth, 37C°	log phase	Salmonella Typhimurium, Shigella flexneri, E. coli O157:H7 ,Yersinia enterocolitica	Shigella flexneri, Klebsiella pneumonia, Escherichia coli, Staphylococcus aureus, Pseudomonas aeruginosa, E. coli O157:H7 ,Yersinia enterocolitica, Salmonella Typhimurium	FRET aptasensor using aptamer labelled Qdots and GO	10 CFU/ml	10 - 107 CFU/ml	Chicken homogenate, milk, meat homogenate	Renuka,Rm. et al 2020*
	B5	DNA	CAGTCCAGGACAGATTCGCGAGCCCACTCCAAACACGACCAACTCACGCTCTATCAACATCGCTATCCACGTGGATTTCATTCAGCGATT	whole cell (S. Typhimurium ATCC14028)	58.5nM	BHI broth,37C°	post-exponential phase	S. aureus, L. monocytogenes, E. coli O157:H7	E. coli O157:H7, S. aureus, or L. monocytogenes	QCM aptasensor	1000 CFU/ml	103 - 107 cfu/mL		Wang et al 2017*
Shigella	Aptamer S 1	DNA	CGGAACTAGCGTTTAAATGCCAGGACTGAAGTAGGCAGGG	whole cell (Shigella dysenteriae)	23.47 ± 2.48 nM	LB	log phase	Staphylococcus aureus, Salmonella Typhimurium, Escherichia coli, Listeria monocytogenes,Vibrio parahaemolyticus	Shigella boydii, Shigella flexneri, Shigella sonnei, Salmonella Typhimurium, Escherichia coli.	Fluorescent microplate sandwich assay with biotinylated aptamer and FAM labelled aptamer	50 CFU/ml	102 - 107 CFU/ml		Duan et al 2013*
						TSB, 37C° , 16hr			heat-killed Shigella dysenteriae, Staphylococcus aureus, Escherichia coli O157:H7, Klebsiella pneumonia, Salmonella enteritidis, Shigella flexneri	Electrochemical impedimetric sensor using glassy carbon electrodes modified with AuNPs and thiolated aptamer	1 CFU/ml	10–106 CFU/mL	water, pasteurized milk, unpasteurized milk	Zarei et al 2018
	Sp1	DNA	TTCTTCCCTTTTATTAGTCCTGTATTCCTCTACTGTTGCC	whole cell (Shigella sonnei ATCC 51334)	5.980 ± 0.835 nM	LB, 37C° , overnight		S. dysenteriae, S. flexneri, S. boydii, S. Typhimurium,E. coli	S. dysenteriae, S. flexneri, S. boydii, S. Typhimurium, E. coli	Fluorescent microplate dual aptamer sandwich assay with biotinylated aptamer and a hexafluorescin labelled aptamer	30CFU/ml	102 - 107 CFU/ml		Gong et al 2015*
						LB broth,37C°	0.3		S. dysenteriae, S. flexneri, S. boydii, S. Typhimurium, S. aureus, E. coli	SERS aptasensor with dual-functional metal complex-ligated AuNPs dimer	10 CFU/ml	10–106 CFU/mL	chicken homogenate,milk	Wu et al 2020
	Sp20	DNA	TCGTCGATTATTGTTTCAGTTCAGTTCCCCCGCGTTCCGA	whole cell (Shigella sonnei ATCC 51334)	14.32 ± 2.19 nM	LB, 37C° , overnight		S. dysenteriae, S. flexneri, S. boydii, S. Typhimurium,E. coli	S. dysenteriae, S. flexneri, S. boydii, S. Typhimurium, S. aureus, E. coli	Fluorescent microplate dual aptamer sandwich assay with biotinylated aptamer and a hexafluorescin labelled aptamer	30 CFU/ml	102 - 107 CFU/ml		Gong et al 2015*
	S.flexneri aptamer1	DNA	CCTCATGTCGAACAGCAACACTGCAACACTGTATAGTCCTGTGTGCCTTGAGCGTTTATTCTGAGCT	whole cell (Shigella flexneri)	29 ± 4 nM				S. dysenteriae, S.paratyphi, E. coli, S. aureus	Fluorescent aptasensor using graphene oxide coupled with carboxyfluorescin labelled aptamer with restriction site and restriction endonuclease ApaI	100 CFU/ml	500-109 CFU/ml	milk	Zhu et al 2015*
	SS-3	DNA	ATACCAGCTTATTCAATTCCATGGTCCCTCGTGTTTATATGTTGTCTGAACTGGCTGAGATTGCACTTACTATCT	whole cell (Shigella sonnei)	39.32 ± 5.02 nM	NB,37C°		E. coli	S. flexneri (KCTC 2517), S. boydii (KCTC 22528), E. coli (KCTC 1116), S. Typhimurium (KCTC 2053)	Fluorescent microplate dual aptamer sandwich assay using amine modified aptamer and Cy5 labelled aptamer	1000 CFU/ml	103–106 CFU/ml	commercial bottled water	Song et al 2017*
	SS-4	DNA	ATACCAGCTTATTCAATTCCACACATACCAAAAACACAGCACACTTCATCAATTTCACGAGATTGCACTTACTATCT	whole cell (Shigella sonnei)	15.89 ± 1.77 nM	NB,37C°		E. coli	S. flexneri (KCTC 2517), S. boydii (KCTC 22528), E. coli (KCTC 1116), S. Typhimurium (KCTC 2053)	Fluorescent microplate dual aptamer sandwich assay using amine modified aptamer and Cy5 labelled aptamer	1000 CFU/ml	103–106 CFU/ml	commercial bottled water	Song et al 2017*
	S.flexneri aptamer`	DNA	CCGGACTAGGGCTGGTTAGCTTCAATACTGCTGGGCGAGG	whole cell (Shigella flexneri ATCC 12022)	42.6 ± 7.11 nM	NB,37C° , 12 hrs			E. coli, L. monocytogenes, S. enteritidis, S. aureus, Shigella sonnei, Shigella boydii, B. cereus,P. aeruginosa	Colorimetric aptasensor using AuNP labelled with aptamers	80 CFU/ml	102 - 106 CFU/ml	salmon homogenate	Feng et al 2019`
Vibrio cholerae	CT916	DNA	GGCAAAAAGGATTGCCCAGGTCTGCTGTCTAGCCGGATTC	Cholerae toxin	48.5 ± 0.5			ethanolamine-blocked magnetic beads	Shiga-like toxin 1 B subunit (SLT1-B), protein A ,BSA	Magentic bead based sandwich ELAA	2.1 ng/ml	1 ng/ml to 1000 ng/ml	tap water	Frohnmeyer et al 2018*
									Shiga-like toxin 1 B subunit (SLT1-B), BSA	Lateral flow assay with either GM1 lipsomes or AuNPs in various assay formats (GMP-aptamer sandwich, compeitive assay, antibody(Ab)-aptamer sandwich, aptamer-Ab-Ab sandwich)	1-100ng/ml			Frohmeyer et al 2019
		DNA	CGTATTAGAGCTTGGCGTAATCATGGTCATAGCTGTTTC	whole cell (V. cholerae O1 -Inaba (ATCC 39315) and Ogawa)	15.404 ± 4.776pM	LB broth,37C°	0.4/log phase	E. coli O157:H7, Shigella dysenteriae, Salmonella enteritidis, Salmonella Typhimurium, Yersinia , Shigella flexneri.	Shigella flexneri, Enterobacter, Proteus vulgaris	Sandwich ELAA	104 CFU/ml			Mojarad et al 2020*
Yersinia	N30yc5			recombinant Yop51	35nM									Bell et al 1998*
	N71yc2			recombinant Yop51	10nM
	M1	DNA	AGCAGCACAGAGGTCAGATGATATAACCTTAATAAATAAAATATAAATTATTTAATCTTACCTATGCGTGCTACCGTGAA	whole cell (Yersinia entercolitica)	37.93 ± 7.88nM	Specific media (5 g NaCl, 3 g beef extract ,5 g peptone,15 g agar per 1L, pH 7.2–7.4), 26C	0.3 (lag), 0.6(log), and 0.9 (stationary)	B. cereus, S. dysenteriae, L. monocytogenes, S. Typhimurium, S. aureus, E. coli	Bacillus cereus, Shigella dysenteriae, Listeria monocytogenes, Salmonella Typhimurium ATCC 14028, Staphylococcus aureus ATCC 29213, Escherichia coli ATCC 25922					Shoaib et al 2020*
	M5	DNA	AGCAGCACAGAGGTCAGATGCTTGGTTCCACCGTACTGACTGTAGTAAAATCTGATCACTCCTATGCGTGCTACCGTGAA	whole cell (Yersinia entercolitica)	74.96 ± 21.34 nM	Specific media (5 g NaCl, 3 g beef extract ,5 g peptone,15 g agar per 1L, pH 7.2–7.4), 26C	0.3 (lag), 0.6(log), and 0.9 (stationary)	B. cereus, S. dysenteriae, L. monocytogenes, S. Typhimurium, S. aureus, E. coli	Bacillus cereus, Shigella dysenteriae, Listeria monocytogenes, Salmonella Typhimurium ATCC 14028, Staphylococcus aureus ATCC 29213, Escherichia coli ATCC 25922					Shoaib et al 2020*
	M7	DNA	AGCAGCACAGAGGTCAGATGTAGTCGGTCTTCTTGTTTGAAACTGCTAATTTTGAAAAAACCTATGCGTGCTACCGTGAA	whole cell (Yersinia entercolitica)	73.02 ± 18.76 nM	Specific media (5 g NaCl, 3 g beef extract ,5 g peptone,15 g agar per 1L, pH 7.2–7.4), 26C	0.3 (lag), 0.6(log), and 0.9 (stationary)	B. cereus, S. dysenteriae, L. monocytogenes, S. Typhimurium, S. aureus, E. coli	Bacillus cereus, Shigella dysenteriae, Listeria monocytogenes, Salmonella Typhimurium ATCC 14028, Staphylococcus aureus ATCC 29213, Escherichia coli ATCC 25922					Shoaib et al 2020*
* REFERS TO STUDY WHERE APTAMER WAS FIRST CREATED
** REFERS TO STUDY WHERE PARAMETER WAS DETERMINED
